# Supplementary material
Source: MDPI journal article supplement (https://www.mdpi.com/2073-4344/10/11/1224)
Supplement: s1 [file s1]

## ***Supplementary Information***

### **Fabrication of conjugated porous polymer catalysts for oxygen reduction reactions: A bottom-up approach**

Sujoy Bandyopadhyay<sup>1,6</sup>, Su Ryong Ha<sup>2</sup>, M. Alam Khan<sup>2</sup>, Cheongbeom Lee<sup>2</sup>, Hong In Jeong<sup>2</sup>, Snehal Lokhandwala<sup>1</sup>, Mohaseen S. Tamboli<sup>2</sup>, Bo Ram Lee<sup>3</sup>, Danil W. Boukhvalov<sup>4,5</sup>, Hyosung Choi<sup>\*2</sup>

<sup>1</sup>*Department of Chemistry, SRICT Institute of Science & Research (SRICT-ISR) Block No. 402, Ankleshwar-Valia Road, Ta: Valia, Dist: Bharuch, Pin–393135, India*

<sup>2</sup>*Department of Chemistry and Research Institute for Natural Sciences, Hanyang University, 222 Wangsimni-ro, Seongdong-gu, Seoul 04763, Republic of Korea*

<sup>3</sup>*Department of Physics, Pukyong National University, 45 Yongso-ro, Nam-Gu, Busan, 48513, Republic of Korea*

<sup>4</sup>*College of Science, Institute of Materials Physics and Chemistry, Nanjing Forestry University, Nanjing 210037, P. R. China*

<sup>5</sup>*Institute of Physics and Technology, Ural Federal University, Mira Street 19, 620002 Yekaterinburg, Russia*

<sup>6</sup>*Department of Chemistry, Indrashil University, Pincode-382740 Rajpur, Gujarat, India.*

#### **\*Corresponding Author**

Prof. Hyosung Choi

Address: 222 Wangsimni-ro, Seongdong-gu, Seoul 04763, South Korea

E-mail address: hschoi202@hanyang.ac.kr

Tel: +82-2-2220-2619

Fax: +82-2-2298-0319

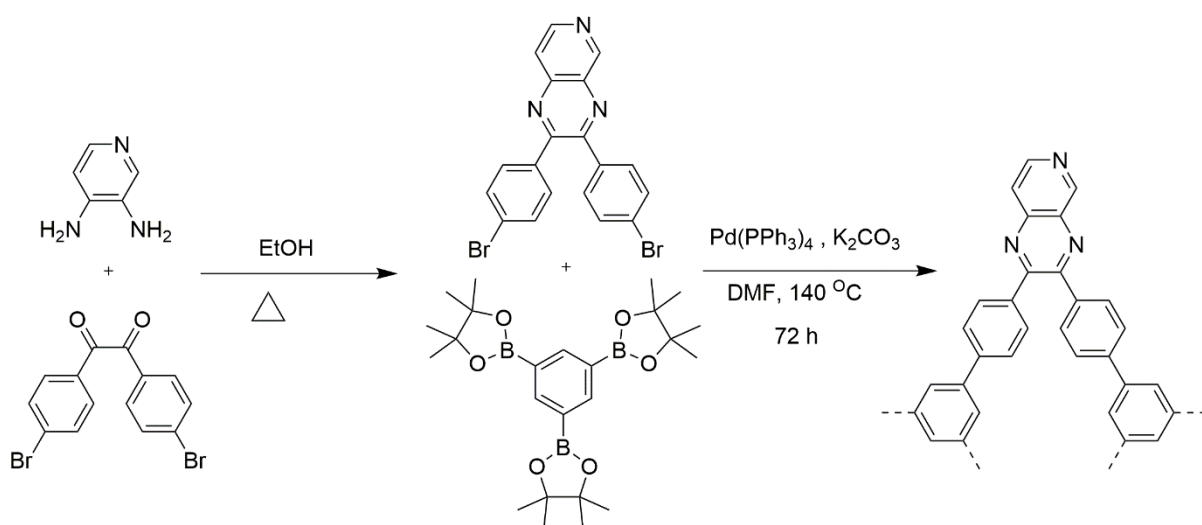

**Scheme S1.** Schematic representation of synthesis of CPOP-P2.

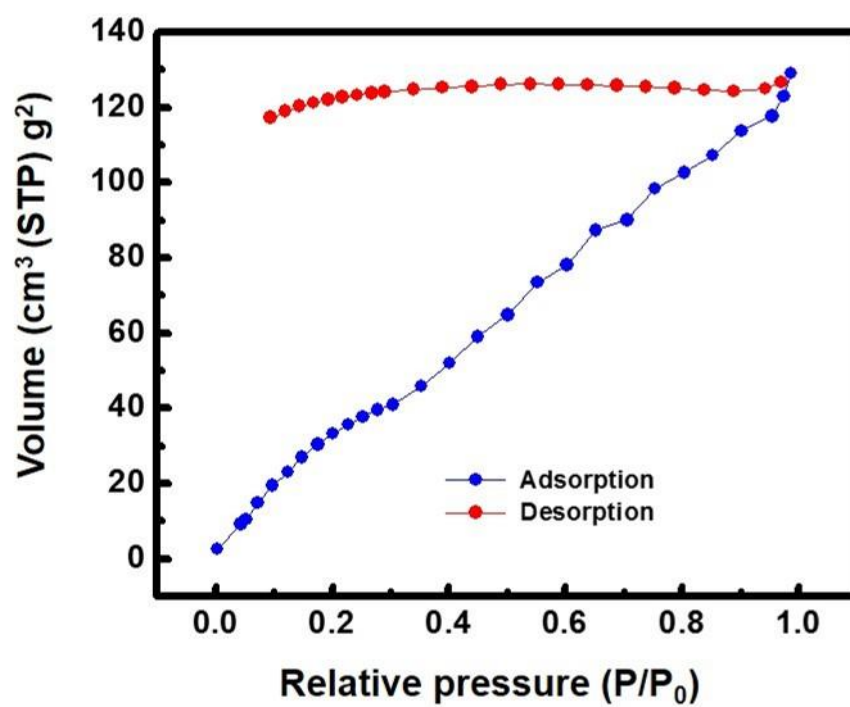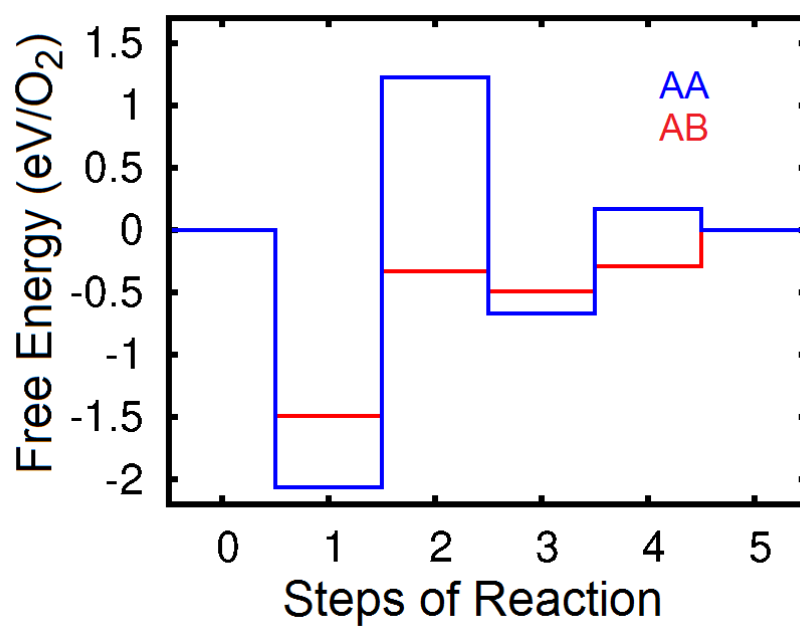

**Figure S2.** Free energy of the ORR involving two pyrazine sites for two different types of CPP-P2 packing (Fig. 6).
